1 **Diversity of coelomycetous fungi in human infections: a 10-**  
2 **year experience of two European reference centres.**

3  
4 Dea Garcia-Hermoso<sup>1</sup>, Nicomedes Valenzuela-Lopez<sup>2,3</sup>, Olga Rivero-Menendez<sup>4</sup>, Ana  
5 Alastruey-Izquierdo<sup>4</sup>, Josep Guarro<sup>2</sup>, José F. Cano-Lira<sup>2#</sup>, Alberto M. Stchigel<sup>2</sup> and the  
6 French Mycoses Study Group

7 <sup>1</sup>Institut Pasteur, CNRS, National Reference Center for Invasive Mycoses and  
8 Antifungals (NRCMA), Molecular Mycology Unit, UMR2000, Paris, France.

9 <sup>2</sup> Mycology Unit, Medical School and IISPV, University Rovira i Virgili, C/ Sant  
10 Llorenç 21, 43201 Reus, Spain.

11 <sup>3</sup>Microbiology Unit, Medical Technology Department, Faculty of Health Science,  
12 University of Antofagasta, Chile.

13 <sup>4</sup>Mycology Reference Laboratory, Spanish National Center for Microbiology, Instituto  
14 de Salud Carlos III, Madrid, Spain

15

16 **Running title:** Coelomycetous fungi of clinical interest in Europe.

17

18 <sup>#</sup>Corresponding author. E-mail: [jose.cano@urv.cat](mailto:jose.cano@urv.cat) Unitat de Micologia, Facultat de  
19 Medicina i Ciències de la Salut, IISPV, Universitat Rovira i Virgili, 21 Sant Llorenç St.,  
20 43201, Reus, Spain.

21 **D.G-H. and N.V-L contributed equally to this article.**

22

23 **No conflict of interest declared.**

24 Word count: abstract = 129; text = 3184 (without ref).

25 **ABSTRACT**

26 The coelomycetous fungi are difficult to properly identify from their phenotypic  
27 characterization and their role as etiologic agents of human infections is not clear. We  
28 studied the species distribution of these fungi among clinical isolates that had been  
29 collected and stored over a ten-year period in two European reference laboratories  
30 (France and Spain). We identified phenotypically and molecularly 97 isolates by  
31 sequencing the D1-D2 fragment of the 28S nrRNA (LSU) gene. Species of the orders  
32 *Pleosporales* and *Glomerellales* were present in both collections, and *Botryosphaeriales*  
33 and *Diaporthales* only in the French one. The most prevalent species were *Medicopsis*  
34 *romeroi*, *Neocucurbitaria keratinophila*, *Neocucurbitaria unguis-hominis* and  
35 *Paraconiothyrium cyclothyrioides*, which had been recovered primarily from superficial  
36 tissues. The *Didymellaceae* was the most common family represented, with 27 isolates  
37 distributed into five genera.

38

39 **Keywords:** *Colletotrichum*, coelomycetes, coelomycetous fungi, *Didymella*,  
40 *Medicopsis*, mycosis, *Neocucurbitaria*, *Paraconiothyrium*, *Phoma*.

## 41 INTRODUCTION

42 Human infections by coelomycetous fungi are rare and poorly characterized due  
43 to the difficulty in identifying these fungi using only phenotypic tools. The  
44 coelomycetous fungi are characterized by the production of conidia into fruiting bodies  
45 (= conidiomata), and were originally included in the orders *Sphaeropsidales* and  
46 *Melanconiales* of the class Coelomycetes, taxa which today lack scientific validity due  
47 to the demonstrated polyphyletic character of this sort of fungus (1–3). They cause  
48 superficial or subcutaneous infections, mostly following a traumatic inoculation of  
49 contaminated plant material or soil particles during agricultural work in tropical and  
50 subtropical areas (4–6). The most common coelomycetous fungi involved in these  
51 infections are the etiologic agents of black-grain eumycetoma, such as *Biatriospora*  
52 *mackinnonii*; *Falciformispora* spp., *Medicopsis romeroi*, and  
53 *Pseudochaetosphaeronema larense*. Other common coelomycetous fungi include  
54 *Lasiodiplodia theobromae* and *Neoscytalidium dimidiatum* (synanamorph of  
55 *Hendersonula toruloidea*) (7–11), which typically cause onychomycosis, subcutaneous  
56 phaeohyphomycosis (12–15), and eumycetoma (16). In addition, many species of  
57 *Phoma* and *Pyrenochaeta* have been reported as occasional agents of localized and  
58 systemic infections in humans (9, 17–20). The taxonomy of several coelomycetous  
59 genera mentioned before have been revised recently but they still constitute a group of  
60 highly polyphyletic taxa that are usually difficult to identify phenotypically (2, 21–24).

61 In a recent study conducted in the USA, Valenzuela-Lopez *et al.* (6) identified  
62 230 fungal strains by sequencing the D1-D2 domains of the 28S rRNA gene (LSU),  
63 from which 152 (66.1%) strains belonged to the order *Pleosporales*, the rest being  
64 distributed in several orders of the phylum Ascomycota. Most of these strains were  
65 recovered from superficial tissue. *Neoscytalidium dimidiatum*, *Paraconiothyrium*

66 *cyclothyrioides* and members of the family *Didymellaceae* were the most prevalent taxa.  
67 In addition, those authors demonstrated the usefulness of the LSU as a good molecular  
68 marker for a preliminary identification of coelomycetous fungi at genus level. In fact,  
69 such locus is easily amplified and many sequences are available in the GenBank  
70 database. However, the nucleotide sequences of more phylogenetically informative  
71 genes need analysing in order to identify the fungi at species level. Genes such as the  
72 RNA polymerase II subunit 2 (*rpb2*), translation elongation factor 1-alpha (*tef1*), beta-  
73 tubulin (*tub2*) and the ribosomal internal transcribed spacer region (ITS), combined in a  
74 multi-locus analysis, have all been recommended for this purpose (25)

75       Until now, the coelomycetous fungi involved in invasive fungal infections (IFIs)  
76 are poorly known in Europe, probably due to the infrequency of these fungi and the  
77 complexity of their identification in the absence of characteristic fruiting bodies when  
78 grown on culture media used in the clinical lab. In a recent French study, eighteen  
79 proven cases of cutaneous and subcutaneous primary infections by coelomycetous fungi  
80 were reported and analysed in patients from tropical and subtropical regions (26).

81       For a better knowledge of the diversity of coelomycetous fungi involved in  
82 human infections, we studied a large set of clinical isolates that had been identified in  
83 two mycology reference centres in France and Spain, and determined their *in vitro*  
84 antifungal susceptibility pattern.

85

## 86 RESULTS

### 87 Locations of infections

88 The majority of the isolates were recovered from superficial tissue, mainly skin  
89 (44%; 43/97), eyes (27%; 26/97), nails/hairs (18%; 17/97) and mouth/sinus (2%; 2/97).  
90 A few were recovered from deeper sites: bones (4%, 4/97), blood (2%, 2/97),  
91 cerebrospinal fluid (n=1), bone marrow (n=1) and lung (n=1) (Table 1 & 2).

### 92 Phylogenetic analyses

93 The maximum-likelihood (ML) phylogenetic analysis of the LSU sequences  
94 (approximately 584 pb) demonstrated that the 97 isolates were distributed into four  
95 orders, but scattered into fourteen clades (Fig. 1). Most of the isolates (81%; 78/97)  
96 belonged to the order *Pleosporales*, which were distributed into nine clades  
97 corresponding to 23 species of twelve genera, followed by those of the  
98 *Botryosphaerales* (8%; 8/97), the *Diaporthales* (6%; 6/97) and the *Glomerellales* (5%;  
99 5/97).

100 The most common species identified was *Medicopsis romeroi* (11%; 11/97),  
101 followed by *Paraconiothyrium cyclothyrioides*, *Neocucurbitaria keratinophila* and *N.*  
102 *unguis-hominis* (8% each; 8/97). These species were mostly isolated from cutaneous  
103 lesions (Table 2).

104 Clade 1 of the *Pleosporales* corresponded to the family *Didymellaceae*, which  
105 included 27 isolates distributed into five genera, morphologically characterized by their  
106 production of pycnidial conidiomata and hyaline, aseptate conidia. The five genera were  
107 *Didymella*, *Epicoccum*, *Neoascochyta*, *Phoma* and *Xenodidymella*. *Didymella* was  
108 represented by 13 isolates, six of them clustering with the type strain of *D. gardeniae*  
109 (CBS 626.68), and the other seven clustered with a reference strain of *D. glomerata*

110 (CBS 528.66). The genus *Epicoccum* grouped five of the isolates, three of them  
111 clustering with a reference strain of *E. sorghinum* (CBS 179.80) and the other two with  
112 the type strain of the type species of the genus, *E. nigrum* (CBS 173.73). The genus  
113 *Phoma* was represented by seven clinical isolates and a reference strain of *Phoma*  
114 *herbarum* (CBS 615.75). Two additional isolates included in this clade (CNRMA 16.76  
115 and CNM-CM 6201) grouped with the type strains of *Xenodidymella saxea* (CBS  
116 419.92) and *Neoscochyta desmazieri* (CBS 297.69), respectively.

117 Clade 2 had two species of *Preussia*: CNM-CM 7335 grouped with a reference  
118 strain of *P. typharum* (CBS 107.69), while CNM-CM 7343 represented an unknown  
119 species forming a sister clade with the type strain of *P. terricola* (CBS 317.65).

120 Clade 3 grouped three isolates of *Paraphoma*, one of them (CNM-CM 8075)  
121 clustered with the type strain of *P. fimeti* (CBS 170.70), and the remaining two  
122 (CNRMA 15.665 and CNRMA 9.467) representing unidentified phoma-like species.

123 Clade 4 had two sister clades of the genus *Tintelnotia*, which produced pycnidia  
124 and hyaline, aseptate conidia. The isolate CNM-CM 7430 was identified as *T.*  
125 *destructans*. However, the other two isolates (CNM-CM 7080 and CNM-CM 7981) did  
126 not cluster with any known species of the genus and might represent new species.

127 Clade 5 had 20 isolates of *Neocucurbitaria*. *Neocucurbitaria keratinophila* and  
128 *N. unguis-hominis* were the most common species, both with eight isolates each.  
129 *Neocucurbitaria cava*, with a single isolate (CNRMA 15.708), was also included in this  
130 clade. Three Spanish isolates, CNM-CM 6489, CNM-CM 7025 and CNM-CM 7132  
131 were identified as *Neocucurbitaria* sp. due to being phylogenetically different from the  
132 other isolates and, again, might be a new species of the genus. *Neocucurbitaria* spp.

133 produces pycnidia, ornamented or not, with bristle-like setose structures, and hyaline,  
134 aseptate conidia.

135 Clade 6 had eleven isolates of *Medicopsis romeroi* (syn. *Pyrenochaeta romeroi*),  
136 which produces pycnidia and hyaline, aseptate conidia.

137 Clade 7 is represented by a single isolate (CNRMA 11.1115), phylogenetically  
138 distinct from the known pleosporalean fungi, possibly representing a novel taxon.

139 Clades 8 and 9 belonged to the family *Didymosphaeriaceae*. Clade 8 included a  
140 single isolate (CNM-CM 6000) phylogenetically related to a reference strain of  
141 *Paraphaeosphaeria michotii* (MFLUCC 13-0349). Clade 9 grouped ten isolates, two  
142 related to a reference strain of *Paraconiothyrium fuckelii* (CBS 797.95) and eight with  
143 the type strain of *Paraconiothyrium cyclothyrioides* (CBS 972.95). Members of the  
144 *Didymosphaeriaceae* form pycnidia and pale brown, 0-1 septate conidia.

145 The order *Botryosphaeriales* are present in Clades 10 to 12. Clade 10 had only  
146 one isolate (CNRMA 12.597) which clustered with a reference strain of *Neofusicoccum*  
147 *luteum* (CBS 110299); Clade 11 also had a single isolate (CNRMA 6.1007) that  
148 clustered with the type strain of *Diplodia seriata* (CBS 112555), and Clade 12 grouped  
149 six isolates, five of them clustering with the type strain of *Lasiodiplodia theobromae*,  
150 and CNRMA 15.383 identified as *Lasiodiplodia* sp. These fungi produce stromatic  
151 conidiomata and aseptate, hyaline to brown, thick-walled conidia.

152 Clade 13 included the type strain of *Diaporthe sclerotioides* (CBS 296.67) and  
153 six isolates corresponding to unidentified species of the genus *Diaporthe*  
154 (*Diaporthales*), none of them able to be morphologically distinguished since they  
155 produce pycnidia and small hyaline conidia.

156 Clade 14, corresponding to the *Glomerellales*, was used as outgroup. Five  
157 isolates nested in the *Colletotrichum* clade, two clustering with reference strains of *C.*  
158 *gigasporum* (CBS 159.75) and *C. gloeosporioides* (CBS 122687), respectively; and the  
159 other three, could not be identified. All the isolates showed the typical morphology of  
160 *Colletotrichum*, i.e., acervuli, conidia variable in shape, flattened with thickened tip  
161 branches (appressoria).

### 162 **Antifungal susceptibility testing**

163 The minimum inhibitory concentration (MIC) was determined for 46 of the  
164 isolates included here (16 from Spain and 30 from France) (Table 3, Table S1).  
165 Globally, the geometric mean (GM) and MIC<sub>50</sub> values of itraconazole and caspofungin  
166 were the highest (Table 3). The MIC of amphotericin B (0.06-1 mg/L) was generally  
167 low among the *Pleosporales* with the exception of one isolate of *M. romeroi* and one of  
168 *D. gardeniae*, with MICs of 8 and 32 mg/L, respectively. The azole MIC ranged  
169 between 0.03 and 1 mg/L for isolates belonging to the genera *Paraconiothyrium*,  
170 *Paraphoma*, *Tintelnotia* and *Neocucurbitaria*, with the exception of two isolates of *N.*  
171 *unguis-hominis*, which showed higher values (16 mg/L). The terbinafine MIC was low  
172 except for *Diaporthe* spp. and a few isolates of *Colletotrichum* spp. and *M. romeroi*.

173



174 **DISCUSSION**

175           The present study is the largest on this taxonomically complex group of fungi  
176 from clinical origin, with almost a hundred isolates morphologically and molecularly  
177 characterized from two southern European countries (France and Spain). Most of these  
178 coelomycetous fungi belonged to the order *Pleosporales* and were most commonly  
179 recovered from superficial infections. Similar results were observed in a previous work  
180 that focused on coelomycetous fungi collected at a North American reference centre (6).  
181 However, the diversity of the fungi identified in that study was higher, i.e. eleven orders  
182 were represented against four here.

183           In the present study, *Medicopsis romeroi* was the most frequently isolated  
184 species whereas the most common taxon in the American study was *Neoscytalidium*  
185 *dimidiatum*. Interestingly, while *M. romeroi* is usually reported as an etiologic agent of  
186 black grain eumycetoma (4, 11, 26–29), our isolates were mainly recovered from eye  
187 and non-mycetoma subcutaneous infections.

188           The second most frequently isolated species were *Paraconiothyrium*  
189 *cyclothyrioides*, *Neocucurbitaria unguis-hominis* and *N. keratinophila*.  
190 *Paraconiothyrium cyclothyrioides* is an emerging pathogen (6, 26, 30, 31) and was  
191 represented by eight isolates recovered from skin or superficial locations and mainly  
192 from tropical regions. *Neocucurbitaria unguis-hominis*, initially described as an agent  
193 of human onychomycosis (17), was equally distributed across both centres (n=8  
194 isolates). Regarding *N. keratinophyla*, this species was reported for the first time from a  
195 corneal infection in Spain (18, 19). Interestingly, as well as being the first case reported  
196 for this species, all the isolates of *N. keratinophyla* were recovered in Spain from  
197 superficial tissue.

198           Other coelomycetous fungi we identified in the present work were *Didymella*  
199 *glomerata* and *Phoma herbarum*. Although *Phoma* spp. are commonly reported as a  
200 coelomycete involved in human infections (9, 20, 32–39), recent extensive changes in  
201 taxonomy and nomenclature have spread all but one of the species into different genera  
202 of the *Didymellaceae*, *Phoma herbarum* remaining as the unique species of the genus  
203 (22–24). Interestingly, *Didymella gardeniae* was commonly found in our study (five  
204 isolates from Spain and one from France).

205           Recently, Ahmed *et al.* (40) proposed *Tintelnotia destructans*, a new phoma-like  
206 fungus belonging to the *Phaeosphaeriaceae* able to cause eye and nail infections. They  
207 reported the successful use of terbinafine against a case of keratitis by this species. Two  
208 of the Spanish isolates recovered from superficial specimens (one cutaneous exudate  
209 and one nail sample) were molecularly related to the above-mentioned species but  
210 phylogenetically different and might represent a new taxon.

211           *Lasiodiplodia theobromae* (order *Botryosphaeriales*) is the only species of this  
212 genus involved in human opportunistic infections (41–46). Valenzuela-Lopez *et al.* (6)  
213 found a higher species diversity in the North American study than we report here, since  
214 five of the French isolates were identified as *L. theobromae*. The other three isolates of  
215 the *Botryosphaeriales* we found were related, one to a different species of *Lasiodiplodia*  
216 and the other two to other genera, specifically *Neofusicoccum* and *Diplodia*.

217           Four species of the genus *Diaporthe* (formerly *Phomopsis*; order *Diaporthales*),  
218 i.e. *D. bougainvilleicola*, *D. longicolla*, *D. phaseolorum* and *D. phoenicicola*, are  
219 considered opportunistic pathogens that cause mycoses that range from superficial to  
220 deep infections (47–51). Six isolates from France were phylogenetically placed into the  
221 latter genus. However, our results are only preliminary since only one phylogenetic

222 marker was analysed. Similar was observed in several polyphyletic genera of the  
223 coelomycetes (52, 53).

224         We also report the finding of five clinical isolates of *Colletotrichum*. Two of the  
225 isolates corresponded to *C. gigasporum* (formerly *C. crassipes*) and *C. gloeosporioides*,  
226 taxa that have previously been reported as agents of keratitis, endophthalmitis and  
227 phaeohyphomycotic cyst; the other three isolates could not be identified at species level.  
228 This genus encompasses numerous plant pathogens that are found worldwide, although  
229 mainly in tropical and subtropical regions (54). The taxonomy of *Colletotrichum* is  
230 complicated and the genus is organized in species-complexes (55–59). Species such as  
231 *C. coccodes*, *C. crassipes*, *C. dematium*, *C. gloeosporioides*, *C. graminicola* and *C.*  
232 *truncatum* cause superficial and deep infections (endophthalmitis, keratitis,  
233 subcutaneous cyst or more rarely arthritis) (60–65). Further studies, including different  
234 phylogenetic markers, are needed to delimit the different species and clarify their  
235 pathogenic role.

236         The antifungal susceptibility of coelomycetous fungi involved in human  
237 infections is poorly known, mainly because they do not easily sporulate. In spite of the  
238 limited number of isolates tested here, amphotericin B seemed the most active drug *in*  
239 *vitro* together with terbinafine, in agreement with Valenzuela-Lopez *et al.* (6). Until  
240 more *in vitro* data is available, the antifungal treatment of the infection by this sort of  
241 fungus remains purely empirical. In a recent study, Guégan *et al.* (26) recommended  
242 extensive surgical resection of affected tissues as a first-line treatment for solitary  
243 subcutaneous lesions by coelomycetous fungi, followed by an antifungal therapy  
244 (posaconazole or voriconazole) in the case of relapse or amphotericin B in refractory  
245 cases.

246           Since our study is based on isolates from the two reference centres, we cannot  
247 comment on the incidence of infections due to coelomycetes nor compare their  
248 epidemiology between France and Spain. However, we still provide a good picture of  
249 the great diversity of coelomycetous fungi in the clinical context, and the basis for  
250 future studies on this interesting but neglected group of fungi.

251

## 252 **MATERIAL AND METHODS**

### 253 **Fungal isolates**

254           We studied 97 isolates of coelomycetous fungi recovered from clinical  
255 specimens, 51 of which were provided by the French National Reference Centre for  
256 Invasive Mycoses and Antifungals (NRCMA) at the *Institut Pasteur*, Paris (CNRMA  
257 isolates, n=51). The NRCMA offers expertise on difficult-to-identify fungi and the  
258 epidemiological surveillance of all cases of IFIs, which are notified on a voluntary basis  
259 either through active or passive surveillance programmes. The Spanish National Centre  
260 of Microbiology at the *Instituto de Salud Carlos III*, Madrid provided 46 isolates  
261 (CNM-CM isolates, n=46). This mycology reference laboratory receives isolates from  
262 the National Health System on a voluntary basis, the main aim of which is to support it  
263 by identifying and profiling the antifungal susceptibility of fungal isolates. The isolates  
264 were collected between 2005 and 2015. Table 1 gives information about the country of  
265 isolation and the location of the infection in the body.

### 266 **Morphological and physiological characterization**

267           For morphology studies, the isolates were cultured on oatmeal agar (OA; 30 g of  
268 filtered oat flakes, 15 g of agar-agar, 1 L tap water) and malt extract agar (MEA; 40 g of  
269 malt extract, 15 g of agar-agar, 1 L distilled water) at  $20 \pm 1^\circ\text{C}$  for 14 days in darkness.

270 The morphological features of the vegetative and reproductive structures were studied  
271 using an Olympus CH2 bright-field microscope (Olympus Corporation, Tokyo, Japan)  
272 in wet mounts (on water and lactic acid) and slide cultures (by growing the isolates on  
273 OA and MEA) of the fungal isolates, following Valenzuela-Lopez *et al.* (6). Colour  
274 standards by Kornerup & Wanscher (66) were used in colony description.  
275 Photomicrographs were taken with an Axio-Imager M1 microscope (Zeiss, Oberkochen,  
276 Germany).

### 277 **DNA extraction, amplification and sequencing**

278 Total genomic DNA was extracted from colonies grown on potato dextrose agar  
279 (PDA; 4 g of potato infusion, 20 g dextrose, 15 g of agar-agar, 1 L tap water) after seven  
280 days of incubation at  $20 \pm 1^\circ\text{C}$ , using the FastDNA kit protocol (Bio101, Vista, CA),  
281 with a FastPrep FP120 instrument (Thermo Savant, Holbrook, NY) following the  
282 manufacturer's protocol. DNA was quantified using the Nanodrop 2000 (Thermo  
283 Scientific, Madrid, Spain). LSU was amplified with the primer pair LR0R and LR5  
284 (67). The amplicons were sequenced in both directions with the same primer pair used  
285 for amplification at Macrogen Europe (Macrogen Inc., Amsterdam, The Netherlands).  
286 The consensus sequences were obtained using the SeqMan software version 7.0.0  
287 (DNASStar Lasergene, Madison, WI, USA).

### 288 **Molecular identification and phylogenetic analysis**

289 Preliminary molecular identification of the isolates was made using LSU  
290 nucleotide sequences in BLAST<sub>N</sub> searches. Twenty-eight LSU sequences of type or  
291 reference strains deposited in the GenBank database by the Westerdijk Fungal  
292 Biodiversity Institute (CBS) and the Mae Fah Luang University (MFLUCC) culture  
293 collections were used for identification and phylogenetic purposes. DNA sequences

294 generated in this study were deposited in GenBank (accession numbers are given in  
295 Table 1).

296 For the phylogenetic study, sequences were aligned using the ClustalW  
297 application (68) of the MEGA 6.06 (69) computer program, and manually adjusted  
298 using the same software platform. Phylogenetic reconstructions were made by  
299 maximum-likelihood (ML) and Bayesian inference (BI) with MEGA 6.06 and MrBayes  
300 3.2.4 (70), respectively. The best substitution model for the gene matrix (TN93+G) was  
301 estimated using MEGA 6.06. For ML analyses, nearest-neighbour interchange was used  
302 as the heuristic method for tree inference. Support for internal branches was assessed by  
303 1,000 ML bootstrapped pseudoreplicates. Bootstrap support (BS) of  $\geq 70$  was considered  
304 significant. For BI analyses, Markov chain Monte Carlo (MCMC) sampling was carried  
305 out with four million generations, with samples taken every 1,000 generations. The 50%  
306 majority rule consensus trees and posterior probability values (PP) were calculated after  
307 removing the first 25% of the resulting trees for burn-in. A PP value of  $\geq 0.95$  was  
308 considered significant. Reference strains of *Colletotrichum gigasporum* (CBS 159.75),  
309 *C. gloeosporioides* (CBS 122687) and *C. hippeastri* (CBS 241.78) were used as  
310 outgroup.

### 311 **Antifungal susceptibility testing**

312 The *in vitro* susceptibility testing in both reference centres (n= 46 isolates)  
313 followed the European Committee on Antimicrobial Susceptibility Testing (EUCAST)  
314 procedure (71, 72). The antifungals used were amphotericin B (Sigma-Aldrich Química,  
315 Madrid, Spain), itraconazole (Sigma-Aldrich Química, Madrid, Spain), posaconazole  
316 (Schering-Plough Research Institute, Kenilworth, N.J.), voriconazole (Pfizer S.A.,  
317 Madrid, Spain), caspofungin (Merck & Co., Inc., Rahway, N.J.), micafungin (Astellas

318 Pharma Inc, Tokyo, Japan) and terbinafine (Novartis, Basel, Switzerland). For the  
319 NCRMA, all antifungal drugs were obtained from ALSACHIM, Strasbourg, France.

320 The isolates were cultured on potato carrot agar (PCA; 20 g each of filtered  
321 potatoes and carrots, 20 g of agar, 1 L of distilled water) or OA for seven to 30 days at  
322 25°C and 30°C to obtain sporulation. Conidia were then collected in sterile water  
323 containing 0.01% (v/v) Tween 80 (Sigma-Aldrich, St. Louis, MO, USA), and the  
324 suspension was adjusted to  $2-5 \times 10^5$  conidia/mL. The minimal effective concentration  
325 (MEC) was determined for each echinocandin and the minimal inhibitory concentration  
326 (MIC) for the other drugs (90% inhibition for amphotericin B and 80% for the azoles)  
327 after 24 h and 48 h of incubation at 35°C. *Aspergillus flavus* ATCC 204304 and  
328 *Aspergillus fumigatus* ATCC 204305 were used as quality control strains in all tests  
329 carried out. Susceptibility profiles were determined for 46 isolates since non-sporulating  
330 isolates were excluded at the NRCMA.

331

332 **ACKNOWLEDGMENTS**

333

334 We thank Cécile Gautier (National Reference Center for invasive Mycoses and  
335 Antifungals [NRCMA]) for technical assistance. This work was supported by the  
336 Spanish *Ministerio de Economía y Competitividad*, grant CGL2017-88094-P.

337

338 Olga Rivero-Menendez holds a fellowship from the *Fondo de Investigaciones*  
339 *Sanitarias* (grant FI14CIII/00025). Ana Alastruey-Izquierdo is supported by a research  
340 project from the *Fondo de Investigación Sanitaria* (FIS) (project PI16CIII/00035).

341

342 **Members of the French Mycoses Study Group** who contributed their clinical isolates  
343 to this study are as follows: Annecy (S. Bland), Bichat (C. Chochillon), Boulogne-  
344 Billancourt (N.Ait-Ammar), Caen (C. Duhamel), Clermont Ferrand (P.Poirier), Cochin  
345 (A. Paugam), Corbeil-Essones (D. Kubab), Guadeloupe (M. Nicolas), La Réunion (S.  
346 Picot), Lyon (A.L. Bienvenu), Martinique (N. Desbois), Nantes (F. Morio), Necker  
347 (M.E. Bougnoux), Nouvelle Calédonie ( R. Goursaud), Pitié (A. Fekkar), Poitiers (C.  
348 Kauffmann), Quinze-Vingts (L. Merabet), Rouen (L. Favennec), Saint Etienne (H.  
349 Raberin), Saint-Louis (A. Alanio), Toulouse (S. Cassaing).

350 **REFERENCES**

351

352 1. Sutton BC. 1980. The Coelomycetes. Fungi Imperfecti with pycnidia, acervuli and  
353 stromata. Commonwealth Mycological, Kew, England.



- 354 2. Aveskamp MM, de Gruyter J, Woudenberg JH, Verkley GJ, Crous PW. 2010.  
355 Highlights of the *Didymellaceae*: a polyphasic approach to characterise *Phoma*  
356 and related pleosporalean genera. *Stud Mycol* 65:1–60.
- 357 3. Wijayawardene NN, Hyde KD, Wanasinghe DN, Papizadeh M, Goonasekara ID,  
358 Camporesi E, Bhat DJ, McKenzie EHC, Phillips AJL, Diederich P, Tanaka K, Li  
359 WJ, Tangthirasunun N, Phookamsak R, Dai D-Q, Dissanayake AJ, Weerakoon G,  
360 Maharachchikumbura SSN, Hashimoto A, Matsumura M, Bahkali AH, Wang Y.  
361 2016. Taxonomy and phylogeny of dematiaceous coelomycetes. *Fungal Divers*  
362 77: 1–316.
- 363 4. Sutton DA. 1999. Coelomycetous fungi in human disease. A review: Clinical  
364 entities, pathogenesis, identification and therapy. *Rev Iberoam Micol* 16:171–179.
- 365 5. Stchigel AM, Sutton DA. 2013. Coelomycete fungi in the clinical lab. *Curr*  
366 *Fungal Infect Rep* 7:171–191.
- 367 6. Valenzuela-Lopez N, Sutton DA, Cano-Lira JF, Paredes K, Wiederhold N, Guarro  
368 J, Stchigel AM. 2017. Coelomycetous fungi in the clinical setting: Morphological  
369 convergence and cryptic diversity. *J Clin Microbiol* 55:552–567.
- 370 7. André M, Brumpt V, Destombes P, Segretain G. 1968. Fungal mycetoma with  
371 black grains due to *Pyrenochaeta romeroi* in Cambodia. *Bull Soc Pathol Exot*  
372 *Filiales* 61:108–12.
- 373 8. Borelli D, Zamora R, Senabre G. 1976. *Chaetosphaeronema larense* nova species  
374 agente de micetoma. *Gaceta Med Caracas* 84:307–318.
- 375 9. Punithalingam E. 1979. *Sphaeropsidales* in culture from humans. *Nova Hedwigia*  
376 31:119–158.
- 377 10. de Hoog GS, Guarro J, Figueras MJ, Gené J. 2000. Atlas of clinical fungi, 2nd ed  
378 Centraalbureau voor Schimmelcultures, Utrecht, The Netherlands.

- 379 11. Ahmed SA, van de Sande WW, Stevens DA, Fahal A, van Diepeningen AD,  
380 Menken SB, de Hoog GS. 2014. Revision of agents of black-grain eumycetoma in  
381 the order Pleosporales. *Persoonia* 33:141–154.
- 382 12. Gentles JC, Evans EG. 1970. Infection of the feet and nails with *Hendersonula*  
383 *toruloidea*. *Sabouraudia* 8:72–75.
- 384 13. Gugnani HC, Oyeka CA. 1989. Foot infections due to *Hendersonula toruloidea*  
385 and *Scytalidium hyalinum* in coal miners. *J Med Vet Mycol* 27:167–179.
- 386 14. Kombila M, Martz M, Gómez de Díaz M, de Bievre C, Richard-Lenoble D. 1990.  
387 *Hendersonula toruloidea* and an agent of mycotic foot infection in Gabon. *J Med*  
388 *Vet Mycol* 28:215–223.
- 389 15. Madrid H, Ruíz-Cendoya M, Cano J, Stchigel A, Orofino R, Guarro J. 2009.  
390 Genotyping and in vitro antifungal susceptibility of *Neoscytalidium dimidiatum*  
391 isolates from different origins. *Int J Antimicrob Agents* 34:351–354.
- 392 16. Restrepo A, Arango M, Velez H, Uribe L. 1976. The isolation of *Botryodiplodia*  
393 *theobromae* from a nail lesion. *Sabouraudia* 14:1–4.
- 394 17. Punithalingam E, English MP. 1975. *Pyrenochaeta unguis-hominis* sp. nov. on  
395 human toe-nails. *Trans Br Mycol Soc* 64:539–541.
- 396 18. Ferrer C, Pérez-Santonja JJ, Rodríguez AE, Colom MF, Gené J, Alio JL, Verkley  
397 GJ, Guarro J. 2009. New *Pyrenochaeta* species causing keratitis. *J Clin Microbiol*  
398 47:1596–1598.
- 399 19. Verkley GJ, Gené J, Guarro J, Pérez-Santonja JJ, Rodríguez AE, Colom MF, Alio  
400 JL, Ferrer C. 2010. *Pyrenochaeta keratinophila* sp. nov., isolated from an ocular  
401 infection in Spain. *Rev Iberoam Micol* 27:22–24.

- 402 20. Roehm CE, Salazar JC, Hagstrom N, Valdez TA. 2012. *Phoma* and *Acremonium*  
403 invasive fungal rhinosinusitis in congenital acute lymphocytic leukemia and  
404 literature review. *Int J Pediatr Otorhinolaryngol* 76:1387–1391.
- 405 21. de Gruyter J, Woudenberg JH, Aveskamp MM, Verkley GJ, Groenewald JZ,  
406 Crous PW. 2013. Redisposition of *Phoma*-like anamorphs in Pleosporales. *Stud*  
407 *Mycol* 75:1–36.
- 408 22. Chen Q, Jiang JR, Zhang GZ, Cai L, Crous PW. 2015. Resolving the *Phoma*  
409 enigma. *Stud Mycol* 82:137–217.
- 410 23. Chen Q, Hou LW, Duan WJ, Crous PW, Cai L. 2017. *Didymellaceae* revisited.  
411 *Stud Mycol* 87:105–159.
- 412 24. Valenzuela-Lopez N, Cano-Lira JF, Guarro J, Sutton DA, Wiederhold N, Crous  
413 PW, Stchigel AM. 2018. Coelomycetous Dothideomycetes with emphasis on the  
414 families *Cucurbitariaceae* and *Didymellaceae*. *Stud Mycol* 90:1–69.
- 415 25. Valenzuela-Lopez N, Cano-Lira JF, Stchigel AM, Guarro J. 2018. DNA  
416 sequencing to clarify the taxonomical conundrum of the clinical coelomycetes.  
417 *Mycoses*. (IN PRESS) DOI:10.1111/myc.12785.
- 418 26. Guégan S, Garcia-Hermoso D, Sitbon K, Ahmed S, Moguelet P, Dromer F,  
419 Lortholary O. 2016. Ten-Year experience of cutaneous and/or subcutaneous  
420 infections due to Coelomycetes in France. *Open Forum Infect Dis*  
421 doi:10.1093/ofid/ofw106.
- 422 27. Khan Z, Ahmad S, Kapila K, Ramaswamy NV, Alath P, Joseph L, Chandy R.  
423 2011. *Pyrenochaeta romeroi*: a causative agent of phaeohyphomycotic cyst. *J*  
424 *Med Microbiol* 60:842–846.

- 425 28. van de Sande WW. 2013. Global burden of human mycetoma: a systematic  
426 review and meta-analysis. *PLoS Negl Trop Dis* 7: e2550. doi:  
427 10.1371/journal.pntd.0002550.
- 428 29. Borman AM, Desnos-Ollivier M, Campbell CK, Bridge PD, Dannaoui E, Johnson  
429 EM. 2016. Novel taxa associated with human fungal black-grain mycetomas:  
430 *Emarellia grisea* gen. nov., sp. nov., and *Emarellia paragrisea* sp. nov. *J Clin*  
431 *Microbiol* 54:1738–1745.
- 432 30. Gordon RA, Sutton DA, Thompson EH, Shrikanth V, Verkley GJM, Stielow JB,  
433 Mays R, Oleske D, Morrison LK, Lapolla WJ, Galfione S, Tyring S, Samathanam  
434 CA, Fu J, Wickes BL, Mulanovich V, Wanger A, Arias CA. 2012. Cutaneous  
435 phaeohyphomycosis caused by *Paraconiothyrium cyclothyrioides*. *J Clin*  
436 *Microbiol* 50:3795–3798.
- 437 31. Colombier MA, Alanio A, Denis B, Melica G, Garcia-Hermoso D, Levy B,  
438 Peraldi MN, Glotz D, Bretagne S, Gallien S. 2015. Dual invasive infection with  
439 *Phaeoacremonium parasiticum* and *Paraconiothyrium cyclothyrioides* in a renal  
440 transplant recipient: Case report and comprehensive review of the literature of  
441 *Phaeoacremonium* phaeohyphomycosis. *J Clin Microbiol* 53:2084–2094.
- 442 32. Bakerspigel A. 1970. The isolation of *Phoma hibernica* from lesions on a leg.  
443 *Sabouraudia* 7:261–264.
- 444 33. Bakerspigel A, Lowe D, Rostas A. 1981. The isolation of *Phoma eupyrena* from a  
445 human lesion. *Arch Dermatol* 117:362–363.
- 446 34. Shukla NP, Rajak RK, Agarwasl GP, Gupta D. 1984. *Phoma minutispora* as a  
447 human pathogen. *Mykosen* 27:255–258.

- 448 35. Baker JG, Salkin IF, Forgacs P, Haines JH, Kemna ME. 1987. First report of  
449 subcutaneous phaeohyphomycosis of the foot caused by *Phoma minutella*. J Clin  
450 Microbiol 25:2395–2397.
- 451 36. Rai M. 1989. *Phoma sorghina* infection in human being. Mycopathologia  
452 105:167–170.
- 453 37. Rosen T, Rinaldi MJ, Tschen JA, Stern JK, Cernoch P. 1996. Cutaneous lesions  
454 due to *Pleurophoma (Phoma)* Complex. South Med J 89:431–434.
- 455 38. Hirsh AH, Schiff TA. 1996. Subcutaneous phaeohyphomycosis caused by an  
456 unusual pathogen: *Phoma* species. J Am Acad Dermatol 34:679–680.
- 457 39. Tullio V, Banche G, Allizond V, Roana J, Mandras N, Scalas D, Panzone M,  
458 Cervetti O, Valle S, Carlone N, Cuffini AM. 2010. Non-dermatophyte moulds as  
459 skin and nail foot mycosis agents: *Phoma herbarum*, *Chaetomium globosum* and  
460 *Microascus cinereus*. Fungal Biol 114:345–349.
- 461 40. Ahmed SA, Hofmüller W, Seibold M, de Hoog GS, Harak H, Tammer I, van  
462 Diepeningen AD, Behrens-Baumann W. 2017. *Tintelnotia*, a new genus in  
463 *Phaeosphaeriaceae* harbouring agents of cornea and nail infections in humans.  
464 Mycoses 60:244–253.
- 465 41. Summerbell RC, Krajden S, Levine R, Fuksa M. 2004. Subcutaneous  
466 phaeohyphomycosis caused by *Lasiodiplodia theobromae* and successfully treated  
467 surgically. Med Mycol 42:543–547.
- 468 42. Woo PC, Lau SK, Ngan AH, Tse H, Tung ET, Yuen KY. 2008. *Lasiodiplodia*  
469 *theobromae* pneumonia in a liver transplant recipient. J Clin Microbiol 46:380–  
470 384.
- 471 43. Kindo AJ, Pramod C, Anita S, Mohanty S. 2010. Maxillary sinusitis caused by  
472 *Lasiodiplodia theobromae*. Indian J Med Microbiol 28:167–169.

- 473 44. Saha S, Sengupta J, Banerjee D, Khetan A. 2012. *Lasiodiplodia theobromae*  
474 keratitis: a case report and review of literature. *Mycopathologia* 174:335–339.
- 475 45. Papacostas LJ, Henderson A, Choong K, Sowden D. 2015. An unusual skin lesion  
476 caused by *Lasiodiplodia theobromae*. *Med Mycol Case Rep* 8:44–46.
- 477 46. Gu HJ, Kim YJ, Lee HJ, Dong SH, Kim SW, Huh HJ, Ki CS. 2016. Invasive  
478 fungal sinusitis by *Lasiodiplodia theobromae* in an patient with aplastic anemia:  
479 An extremely rare case report and literature review. *Mycopathologia* 181:901–  
480 908.
- 481 47. Sutton DA, Timm WD, Morgan-Jones G, Rinaldi MG. 1999. Human  
482 phaeohyphomycotic osteomyelitis caused by the Coelomycete *Phomopsis*  
483 Saccardo 1905: Criteria for identification, case history, and therapy. *J Clin*  
484 *Microbiol* 37:807–811.
- 485 48. Gajjar DU, Pal AK, Parmar TJ, Arora AI, Ganatra DA, Kayastha FB, Ghodadra  
486 BK, Vasavada AR. 2011. Fungal scleral keratitis caused by *Phomopsis*  
487 *phoenicicola*. *J Clin Microbiol* 49:2365–2368.
- 488 49. Garcia-Reyne A, López-Medrano F, Morales JM, García Esteban C, Martín I,  
489 Eraña I, Meije Y, Lalueza A, Alastruey-Izquierdo A, Rodríguez-Tudela JL,  
490 Aguado JM. 2011. Cutaneous infection by *Phomopsis longicolla* in a renal  
491 transplant recipient from Guinea: first report of human infection by this fungus.  
492 *Transpl Infect Dis* 13:204–207.
- 493 50. Iriart X, Binois R, Fior A, Blanchet D, Berry A, Cassaing S, Amazan E, Papot E,  
494 Carme B, Aznar C, Couppié P. 2011. Eumycetoma caused by *Diaporthe*  
495 *phaseolorum* (*Phomopsis phaseoli*): a case report and a mini-review of  
496 *Diaporthe/Phomopsis* spp invasive infections in humans. *Clin Microbiol Infect*  
497 17:1492–1494.

- 498 51. Cariello PF, Wickes BL, Sutton DA, Castlebury LA, Levitz SM, Finberg RW,  
499 Thompson EH, Daly JS. 2013. *Phomopsis bougainvilleicola* prepatellar bursitis in  
500 a renal transplant recipient. *J Clin Microbiol* 51:692–695.
- 501 52. Udayanga D, Liu X, Crous PW, McKenzie EHC, Chukeatirote E, Hyde KD.  
502 2012. A multi-locus phylogenetic evaluation of *Diaporthe* (*Phomopsis*). *Fungal*  
503 *Divers* 56:157–171.
- 504 53. Gomes RR, Glienke C, Videira SI, Lombard L, Groenewald JZ, Crous PW. 2013.  
505 *Diaporthe*: a genus of endophytic, saprobic and plant pathogenic fungi. *Persoonia*  
506 31:1–41.
- 507 54. Cannon PF, Damm U, Johnston PR, Weir BS. 2012. *Colletotrichum* - current  
508 status and future directions. *Stud Mycol* 73:181–213.
- 509 55. Damm U, Cannon PF, Woudenberg JH, Johnston PR, Weir BS, Tan YP, Shivas  
510 RG, Crous PW. 2012. The *Colletotrichum boninense* species complex. *Stud*  
511 *Mycol* 73:1–36.
- 512 56. Damm U, Cannon PF, Woudenberg JH, Crous PW. 2012. The *Colletotrichum*  
513 *acutatum* species complex. *Stud Mycol* 73:37–113.
- 514 57. Weir BS, Johnston PR, Damm U. 2012. The *Colletotrichum gloeosporioides*  
515 species complex. *Stud Mycol* 73:115–180.
- 516 58. Damm U, O'Connell RJ, Groenewald JZ, Crous PW. 2014. The *Colletotrichum*  
517 *destructivum* species complex - hemibiotrophic pathogens of forage and field  
518 crops. *Stud Mycol* 79:49–84.
- 519 59. Liu F, Cai L, Crous PW, Damm U. 2014. The *Colletotrichum gigasporum* species  
520 complex. *Persoonia* 33:83–97.

- 521 60. Guarro J, Svidzinski TE, Zaror L, Forjaz MH, Gené J, Fischman O. 1998.  
522 Subcutaneous hyalohyphomycosis caused by *Colletotrichum gloeosporioides*. J  
523 Clin Microbiol 36:3060–3065.
- 524 61. Cano J, Guarro J, Gené J. 2004. Molecular and morphological identification of  
525 *Colletotrichum* species of clinical interest. J Clin Microbiol 42:2450–2454.
- 526 62. Yegneswaran PP, Pai V, Bairy I, Bhandary S. 2010. *Colletotrichum graminicola*  
527 keratitis: first case report from India. Indian J Ophthalmol 58:415–417.
- 528 63. Shivaprakash MR, Appannanavar SB, Dhaliwal M, Gupta A, Gupta S, Gupta A,  
529 Chakrabarti A. 2011. *Colletotrichum truncatum*: An unusual pathogen causing  
530 mycotic keratitis and endophthalmitis. J Clin Microbiol 49:2894–2898.
- 531 64. Figtree M, Weeks K, Chan L, Leyton A, Bowes A, Giuffre B, Sullivan M,  
532 Hudson BJ. 2013. *Colletotrichum gloeosporioides* sensu lato causing deep soft  
533 tissue mycosis following a penetrating injury. Med Mycol Case Rep 2:40–43.
- 534 65. Cho JC, Sharma RS, Sutton DA, Wiederhold NP, Sanders C, Wickes BL, Estrada  
535 SJ. 2015. Fungal arthritis secondary to *Colletotrichum gloeosporioides*. JMM  
536 Case Rep 2 doi: 10.1099/jmmcr.0.000012.
- 537 66. Kornerup A, Wanscher JH. 1978. Methuen handbook of colour 3rd ed. Methuen,  
538 London, England.
- 539 67. Vilgalys R, Hester M. 1990. Rapid genetic identification and mapping of  
540 enzymatically amplified ribosomal DNA from several *Cryptococcus* species. J  
541 Bacteriol 172:4238–4246.
- 542 68. Thompson JD, Higgins DG, Gibson TJ. 1994. CLUSTAL W: improving the  
543 sensitivity of progressive multiple sequence alignment through sequence  
544 weighting, position-specific gap penalties and weight matrix choice. Nucleic  
545 Acids Res 22:4673–4680.



- 546 69. Tamura K, Stecher G, Peterson D, Filipski A, Kumar S. 2013. MEGA6:  
547 Molecular evolutionary genetics analysis version 6.0. *Mol Biol Evol* 30:2725–  
548 2729.
- 549 70. Huelsenbeck JP, Ronquist F. 2001. MRBAYES: Bayesian inference of  
550 phylogenetic trees. *Bioinformatics* 17:754–755.
- 551 71. Subcommittee on Antifungal Susceptibility Testing of the ESCMID European  
552 Committee for Antimicrobial Susceptibility Testing (EUCAST). 2008. EUCAST  
553 Technical Note on the method for the determination of broth dilution minimum  
554 inhibitory concentrations of antifungal agents for conidia-forming moulds. *Clin*  
555 *Microbiol Infect* 14:982–984.
- 556 72. Garcia-Hermoso D, Hoinard D, Gantier JC, Grenouillet F, Dromer F, Dannaoui E.  
557 2009. Molecular and phenotypic evaluation of *Lichtheimia corymbifera* (formerly  
558 *Absidia corymbifera*) complex isolates associated with human mucormycosis:  
559 rehabilitation of *L. ramosa*. *J Clin Microbiol* 47:3862–3870.
- 560

561 **FIGURE LEGEND**

562 **FIG 1** Maximum likelihood tree obtained from the D1-D2 of LSU (584 bp) sequences  
563 of the 125 strains, where 28 belong to type or reference strains. The branch lengths are  
564 proportional to phylogenetic distance. Bayesian posterior probability scores  $\geq 0.95$  and  
565 Bootstrap support values  $\geq 70\%$  are indicated on the nodes. Some branches were  
566 shortened to fit them to the page, these are indicated by two diagonal lines with the  
567 number of times a branch was shortened. The species of the genus *Colletotrichum* were  
568 used to root the tree. Superscript <sup>T</sup> indicated the type strains.

569

570

**TABLE 1** Taxonomical identification of the isolates studied, origin and GenBank accession numbers. New sequences generated are indicate in bold.

| Order                   | Species                         | Strain no. <sup>a</sup>        | Origin                           | Country                          | GenBank accession no. <sup>b</sup> |          |
|-------------------------|---------------------------------|--------------------------------|----------------------------------|----------------------------------|------------------------------------|----------|
| <i>Botryosphaerales</i> | <i>Diplodia seriata</i>         | CBS 112555 <sup>T</sup>        | <i>Vitis vinifera</i> dead plant | Portugal                         | KF766327                           |          |
|                         |                                 | CNRMA 6.1007                   | bone                             | France                           | <b>LT965964</b>                    |          |
|                         | <i>Lasiodiplodia</i> sp.        | CNRMA 15.383                   | eye                              | France (West Indies, Guadeloupe) | <b>LT965965</b>                    |          |
|                         | <i>Lasiodiplodia theobromae</i> | CBS 164.96 <sup>T</sup>        | fruit along coral reef coast     | Papua New Guinea                 | NG_042460                          |          |
|                         |                                 | CNRMA 10.1369                  | skin                             | France (West Indies, Martinique) | <b>LT965966</b>                    |          |
|                         |                                 | CNRMA 10.813                   | eye                              | France (West Indies, Martinique) | <b>LT965967</b>                    |          |
|                         |                                 | CNRMA 11.360                   | eye                              | France (West Indies, Martinique) | <b>LT965968</b>                    |          |
|                         |                                 | CNRMA 13.891                   | skin                             | France                           | <b>LT965969</b>                    |          |
|                         |                                 | CNRMA 14.708                   | eye                              | France (West Indies, Guadeloupe) | <b>LT965970</b>                    |          |
|                         | <i>Neofusicoccum luteum</i>     | CBS 110299                     | <i>Vitis vinifera</i> cane       | Portugal                         | AY928043                           |          |
|                         |                                 | CNRMA 12.597                   | eye                              | France                           | <b>LT965971</b>                    |          |
|                         | <i>Diaporthales</i>             | <i>Diaporthe sclerotioides</i> | CBS 296.67 <sup>T</sup>          | <i>Cucumis sativus</i> root      | The Netherlands                    | AF439628 |
|                         |                                 | <i>Diaporthe</i> sp.           | CBS 477                          | <i>Cucumis sativus</i>           | USA                                | AF439631 |
| CNRMA 8.522             |                                 |                                | eye                              | France                           | <b>LT965972</b>                    |          |
| CNRMA 9.205             |                                 |                                | eye                              | France (West Indies, Guadeloupe) | <b>LT965973</b>                    |          |
| CNRMA 11.385            |                                 |                                | eye                              | France (West Indies, Martinique) | <b>LT965974</b>                    |          |
| CNRMA 12.311            |                                 |                                | blood                            | France                           | <b>LT965975</b>                    |          |
| CNRMA 13.515            |                                 |                                | skin                             | France                           | <b>LT965976</b>                    |          |
| CNRMA 14.198            |                                 |                                | skin                             | France                           | <b>LT965977</b>                    |          |

|                            |                                       |                            |                                     |                                  |                 |                 |
|----------------------------|---------------------------------------|----------------------------|-------------------------------------|----------------------------------|-----------------|-----------------|
| <b>Glomerellales</b>       | <i>Colletotrichum gigasporum</i>      | CBS 159.75                 | air and stored grains               | India                            | DQ286206        |                 |
|                            |                                       | CNRMA 16.553               | skin                                | France (West Indies, Guadeloupe) | <b>LT965978</b> |                 |
|                            | <i>Colletotrichum gloeosporioides</i> | CBS 122687                 | <i>Leucospermum</i> sp. leaf litter | South Africa                     | EU552111        |                 |
|                            |                                       | CNRMA 15.504               | eye                                 | France (West Indies, Martinique) | <b>LT965979</b> |                 |
|                            | <i>Colletotrichum hippeastri</i>      | CBS 241.78                 | <i>Hippeastrum</i> sp.              | The Netherlands                  | DQ286167        |                 |
|                            | <i>Colletotrichum</i> sp.             | CNM-CM4760                 | corneal swab                        | Spain                            | <b>LT965980</b> |                 |
|                            |                                       | CNM-CM 6116                | conjunctival                        | Spain                            | <b>LT965981</b> |                 |
|                            |                                       | CNM-CM 7345                | humor acuusus                       | Spain                            | <b>LT965982</b> |                 |
|                            | <b>Pleosporales</b>                   | <i>Didymella gardeniae</i> | CBS 626.68 <sup>T</sup>             | <i>Gardenia jasminoides</i> leaf | India           | GQ387595        |
|                            |                                       |                            | CNM-CM 3697                         | nail                             | Spain           | <b>LT965983</b> |
| CNM-CM 3895                |                                       |                            | nail                                | Spain                            | <b>LT965984</b> |                 |
| CNM-CM 5036                |                                       |                            | scales                              | Spain                            | <b>LT965985</b> |                 |
| CNM-CM 5814                |                                       |                            | conjunctival exudate                | Spain                            | <b>LT965986</b> |                 |
| CNM-CM 7499                |                                       |                            | conjunctival exudate                | Spain                            | <b>LT965987</b> |                 |
| CNRMA 11.794               |                                       |                            | skin                                | France                           | <b>LT965988</b> |                 |
| <i>Didymella glomerata</i> |                                       | CBS 528.66                 | <i>Chrysanthemum</i> sp. cutting    | The Netherlands                  | EU754184        |                 |
|                            |                                       | CNM-CM 3356                | toenail                             | Spain                            | <b>LT965989</b> |                 |
|                            |                                       | CNM-CM 3546                | nail                                | Spain                            | <b>LT965990</b> |                 |
|                            |                                       | CNM-CM 4675                | nail                                | Spain                            | <b>LT965991</b> |                 |
|                            |                                       | CNM-CM 7099                | cutaneous exudate                   | Spain                            | <b>LT965992</b> |                 |
|                            |                                       | CNRMA 9.1046               | skin                                | France                           | <b>LT965993</b> |                 |

|                               |                         |                                |                        |                 |
|-------------------------------|-------------------------|--------------------------------|------------------------|-----------------|
|                               | CNRMA 10.867            | skin                           | France                 | <b>LT965994</b> |
|                               | CNRMA 15.6              | mouth/sinus                    | France                 | <b>LT965995</b> |
| <i>Epicoccum nigrum</i>       | CBS 173.73 <sup>T</sup> | <i>Dactylis glomerata</i> seed | USA                    | GU237975        |
|                               | CNM-CM 5281             | skin                           | Spain                  | <b>LT965996</b> |
|                               | CNM-CM 5724             | vitreous humor                 | Spain                  | <b>LT965997</b> |
| <i>Epicoccum sorghinum</i>    | CBS 179.80              | <i>Sorghum vulgare</i>         | Puerto Rico            | GU237978        |
|                               | CNRMA 7.167             | bone                           | France (New Caledonia) | <b>LT965998</b> |
|                               | CNRMA 10.947            | skin                           | France (New Caledonia) | <b>LT965999</b> |
|                               | CNRMA 10.948            | skin                           | France (New Caledonia) | <b>LT966000</b> |
| <i>Medicopsis romeroi</i>     | CBS 252.60 <sup>T</sup> | maduromycosis                  | Venezuela              | EU754207        |
|                               | CNM-CM 3387             | knee ulcer                     | Spain                  | <b>LT966001</b> |
|                               | CNM-CM 7645             | cutaneous exudate              | Spain                  | <b>LT966002</b> |
|                               | CNRMA 4.200             | eye                            | France                 | <b>LT966003</b> |
|                               | CNRMA 5.321             | skin                           | France                 | <b>LT966005</b> |
|                               | CNRMA 7.1225            | skin                           | France                 | <b>LT966007</b> |
|                               | CNRMA 8.1363            | skin                           | France                 | <b>LT966008</b> |
|                               | CNRMA 11.680            | skin                           | France                 | <b>LT966010</b> |
|                               | CNRMA 11.949            | bone                           | France                 | <b>LT966011</b> |
|                               | CNRMA 14.407            | skin                           | France                 | <b>LT966013</b> |
|                               | CNRMA 15.461            | bone                           | France                 | <b>LT966014</b> |
|                               | CNRMA 15.7              | skin                           | France                 | <b>LT966015</b> |
| <i>Neoscochyta desmazieri</i> | CBS 297.69 <sup>T</sup> | <i>Lolium perenne</i>          | Germany                | KT389726        |
|                               | CNM-CM 6201             | nail                           | Spain                  | <b>LT966016</b> |

|                                       |                         |                      |         |                 |
|---------------------------------------|-------------------------|----------------------|---------|-----------------|
| <i>Neocucurbitaria cava</i>           | CBS 257.68 <sup>T</sup> | wheat-field soil     | Germany | EU754199        |
|                                       | CNRMA 15.708            | mouth/sinus          | France  | <b>LT966017</b> |
| <i>Neocucurbitaria keratinophila</i>  | CBS 121759 <sup>T</sup> | corneal scrapings    | Spain   | LT623215        |
|                                       | CNM-CM 5882             | cutaneous exudate    | Spain   | <b>LT966018</b> |
|                                       | CNM-CM 6401             | finger nail          | Spain   | <b>LT966019</b> |
|                                       | CNM-CM 6455             | cutaneous exudate    | Spain   | <b>LT966020</b> |
|                                       | CNM-CM 7013             | cutaneous exudate    | Spain   | <b>LT966021</b> |
|                                       | CNM-CM 7457             | cutaneous exudate    | Spain   | <b>LT966022</b> |
|                                       | CNM-CM 7731             | cutaneous exudate    | Spain   | <b>LT966023</b> |
|                                       | CNM-CM 8010             | conjunctival exudate | Spain   | <b>LT966024</b> |
|                                       | CNM-CM 8674             | toenail              | Spain   | <b>LT966025</b> |
| <i>Neocucurbitaria unguis-hominis</i> | CBS 112.79              | airborn              | Wales   | GQ387622        |
|                                       | CNM-CM 7037             | nail                 | Spain   | <b>LT966026</b> |
|                                       | CNM-CM 7089             | cutaneous lesion     | Spain   | <b>LT966027</b> |
|                                       | CNM-CM 8717             | urine                | Spain   | <b>LT966028</b> |
|                                       | CNM-CM 8743             | toenail              | Spain   | <b>LT966029</b> |
|                                       | CNRMA 4.1112            | eye                  | France  | <b>LT966030</b> |
|                                       | CNRMA 6.243             | eye                  | France  | <b>LT966031</b> |
|                                       | CNRMA 16.153            | eye                  | France  | <b>LT966032</b> |
|                                       | CNRMA 16.19             | lung                 | France  | <b>LT966033</b> |
| <i>Neocucurbitaria</i> sp.            | CNM-CM 6489             | wound exudate        | Spain   | <b>LT966034</b> |
|                                       | CNM-CM 7025             | hair                 | Spain   | <b>LT966035</b> |
|                                       | CNM-CM 7132             | toenail              | Spain   | <b>LT966036</b> |

|                                         |                         |                                   |                                  |                 |
|-----------------------------------------|-------------------------|-----------------------------------|----------------------------------|-----------------|
| <i>Paraconiothyrium cyclothyrioides</i> | CBS 972.95 <sup>T</sup> | soil                              | Papua New Guinea                 | JX496232        |
|                                         | CNM-CM 6313             | conjunctival exudate              | Spain                            | <b>LT966037</b> |
|                                         | CNM-CM 6513             | nail                              | Spain                            | <b>LT966038</b> |
|                                         | CNM-CM 4767             | abscess                           | Spain                            | <b>LT966039</b> |
|                                         | CNRMA 11.383            | skin                              | France (West Indies, Martinique) | <b>LT966041</b> |
|                                         | CNRMA 11.855            | skin                              | France                           | <b>LT966042</b> |
|                                         | CNRMA 13.245            | skin                              | France                           | <b>LT966043</b> |
|                                         | CNRMA 16.374            | skin                              | France (West Indies, Guadeloupe) | <b>LT966044</b> |
|                                         | CNRMA 16.556            | skin                              | France (West Indies, Guadeloupe) | <b>LT966045</b> |
| <i>Paraconiothyrium fuckelii</i>        | CBS 797.95              | <i>Rubus</i> sp. dead stem        | Denmark                          | JX496226        |
|                                         | CNRMA 3.240             | eye                               | France                           | <b>LT966046</b> |
|                                         | CNRMA 4.493             | eye                               | France                           | <b>LT966047</b> |
| <i>Paraphaeosphaeria michotii</i>       | MFLUCC 13-0349          | <i>Poaceae</i> dead leaves        | Italy                            | KJ939282        |
|                                         | CNM-CM 6000             | skin                              | Spain                            | <b>LT966048</b> |
| <i>Paraphoma fimeti</i>                 | CBS 170.70 <sup>T</sup> | <i>Apium graveolens</i> seeds     | The Netherlands                  | GQ387584        |
|                                         | CNM-CM 8075             | wound exudate                     | Spain                            | <b>LT966049</b> |
| <i>Paraphoma</i> sp.                    | CNRMA 9.467             | skin                              | France                           | <b>LT966050</b> |
|                                         | CNRMA 15.665            | skin                              | France                           | <b>LT966051</b> |
| <i>Phaeosphaeriopsis obtusispora</i>    | CBS 246.64              | <i>Aloe arborescens</i> dead leaf | Portugal                         | JX681119        |
| <i>Phoma herbarum</i>                   | CBS 615.75              | <i>Rosa multiflora</i> dead stem  | The Netherlands                  | EU754186        |

|                                 |                         |                                      |          |                 |
|---------------------------------|-------------------------|--------------------------------------|----------|-----------------|
|                                 | CNM-CM 2132             | right toe                            | Spain    | <b>LT966052</b> |
|                                 | CNM-CM 3526             | bone marrow                          | Spain    | <b>LT966053</b> |
|                                 | CNM-CM 3597             | blood culture                        | Spain    | <b>LT966054</b> |
|                                 | CNM-CM 8031             | nail                                 | Spain    | <b>LT966055</b> |
|                                 | CNRMA 9.1095            | skin                                 | France   | <b>LT966056</b> |
|                                 | CNRMA 11.1097           | eye                                  | France   | <b>LT966057</b> |
|                                 | CNRMA 12.1227           | eye                                  | France   | <b>LT966058</b> |
| pleosporelean fungus            | CNRMA 11.1115           | skin                                 | France   | <b>LT966059</b> |
| <i>Preussia</i> sp.             | CNM-CM 7343             | nail                                 | Spain    | <b>LT966060</b> |
| <i>Preussia terricola</i>       | CBS 317.65 <sup>T</sup> | <i>Musa sapientum</i><br>rhizosphere | Honduras | GQ203725        |
| <i>Preussia typharum</i>        | CBS 107.69              | Dung of deer                         | Japan    | GQ203726        |
|                                 | CNM-CM 7335             | nail                                 | Spain    | <b>LT966061</b> |
| <i>Pseudophaeosphaeria rubi</i> | MFLUCC 14-0259          | <i>Rubus idaeus</i> dead<br>branch   | Italy    | KX765299        |
| <i>Tintelnotia destructans</i>  | CBS 127737 <sup>T</sup> | anterior eye chamber<br>cornea       | Germany  | KY090664        |
|                                 | CNM-CM 7430             | Unknown                              | Spain    | <b>LT966062</b> |
| <i>Tintelnotia</i> sp.          | CNM-CM 7080             | nail                                 | Spain    | <b>LT966063</b> |
|                                 | CNM-CM 7981             | cutaneous exudate                    | Spain    | <b>LT966064</b> |
| <i>Xenodidymella saxea</i>      | CBS 419.92 <sup>T</sup> | Corroded<br>mediterranean marble     | Unknown  | GU238141        |



CNRMA 16.76

Cerebrospinal fluid

France

**LT966065**

---

<sup>a</sup> **CBS**: Strains from Westerdijk Fungal Biodiversity Institute, Utrecht, The Netherlands; **CNM-CM**: Isolates from the National Centre for Microbiology, Instituto Carlos III, Madrid, Spain; **CNRMA**: Isolates from the National Reference Center for Invasive Mycoses and Antifungals; Institut Pasteur, Paris, France; **MFLUCC**: Strains from Mae Fah Luang University Culture Collection, Chiang Rai, Thailand. Type strains are indicated by a superscript <sup>T</sup>

<sup>b</sup> LSU, large subunit ribosomal DNA sequences

**TABLE 2** Localization of infections due to coelomycetous fungi isolates

| <b>Orders</b>                    | <b>no. of isolates obtained from:</b> |                       |                              |
|----------------------------------|---------------------------------------|-----------------------|------------------------------|
|                                  | <b>Superficial infection</b>          | <b>Deep infection</b> | <b>Total no. of isolates</b> |
| <i>Botryosphaerales</i>          | 7                                     | 1                     | 8                            |
| <i>Diaporthales</i>              | 5                                     | 1                     | 6                            |
| <i>Glomerellales</i>             | 5                                     |                       | 5                            |
| <i>Pleosporales</i>              | 71                                    | 7                     | 78                           |
| <b>Total no. of isolates (%)</b> | <b>88 (91)</b>                        | <b>9 (9)</b>          | <b>97 (100)</b>              |

**TABLE 3** Overall *in vitro* antifungal activity against the 46 coelomycetous isolates as determined by EUCAST<sup>a</sup> methodology

| Antifungal agent | MIC/MEC values (mg/L) <sup>b</sup> |        |      |                   |                   |
|------------------|------------------------------------|--------|------|-------------------|-------------------|
|                  | range                              | median | GM   | MIC <sub>50</sub> | MIC <sub>90</sub> |
| Amphotericin B   | 0.03 -16                           | 0.5    | 0.41 | 0.25              | 1                 |
| Itraconazole     | 0.014 -16                          | 2      | 1.72 | 0.5               | 16                |
| Voriconazole     | 0.03 -16                           | 0.5    | 0.70 | 0.6               | 4                 |
| Posaconazole     | 0.014 -16                          | 0.5    | 0.58 | 0.25              | 8                 |
| Caspofungin      | 0.125- 16                          | 2      | 2.17 | 1                 | 8                 |
| Micafungin       | 0.015- 16                          | 0.5    | 0.53 | 0.125             | 8                 |
| Terbinafin       | 0.014- 16                          | 0.25   | 0.39 | 0.25              | 2                 |

<sup>a</sup>EUCAST, European Committee on Antimicrobial Susceptibility Testing procedure (71);

<sup>b</sup>MIC, minimum inhibitory concentration; MEC, minimal effective concentration; MIC<sub>50</sub> and MIC<sub>90</sub>, MIC encompassing 50 and 90% of isolates tested, respectively.

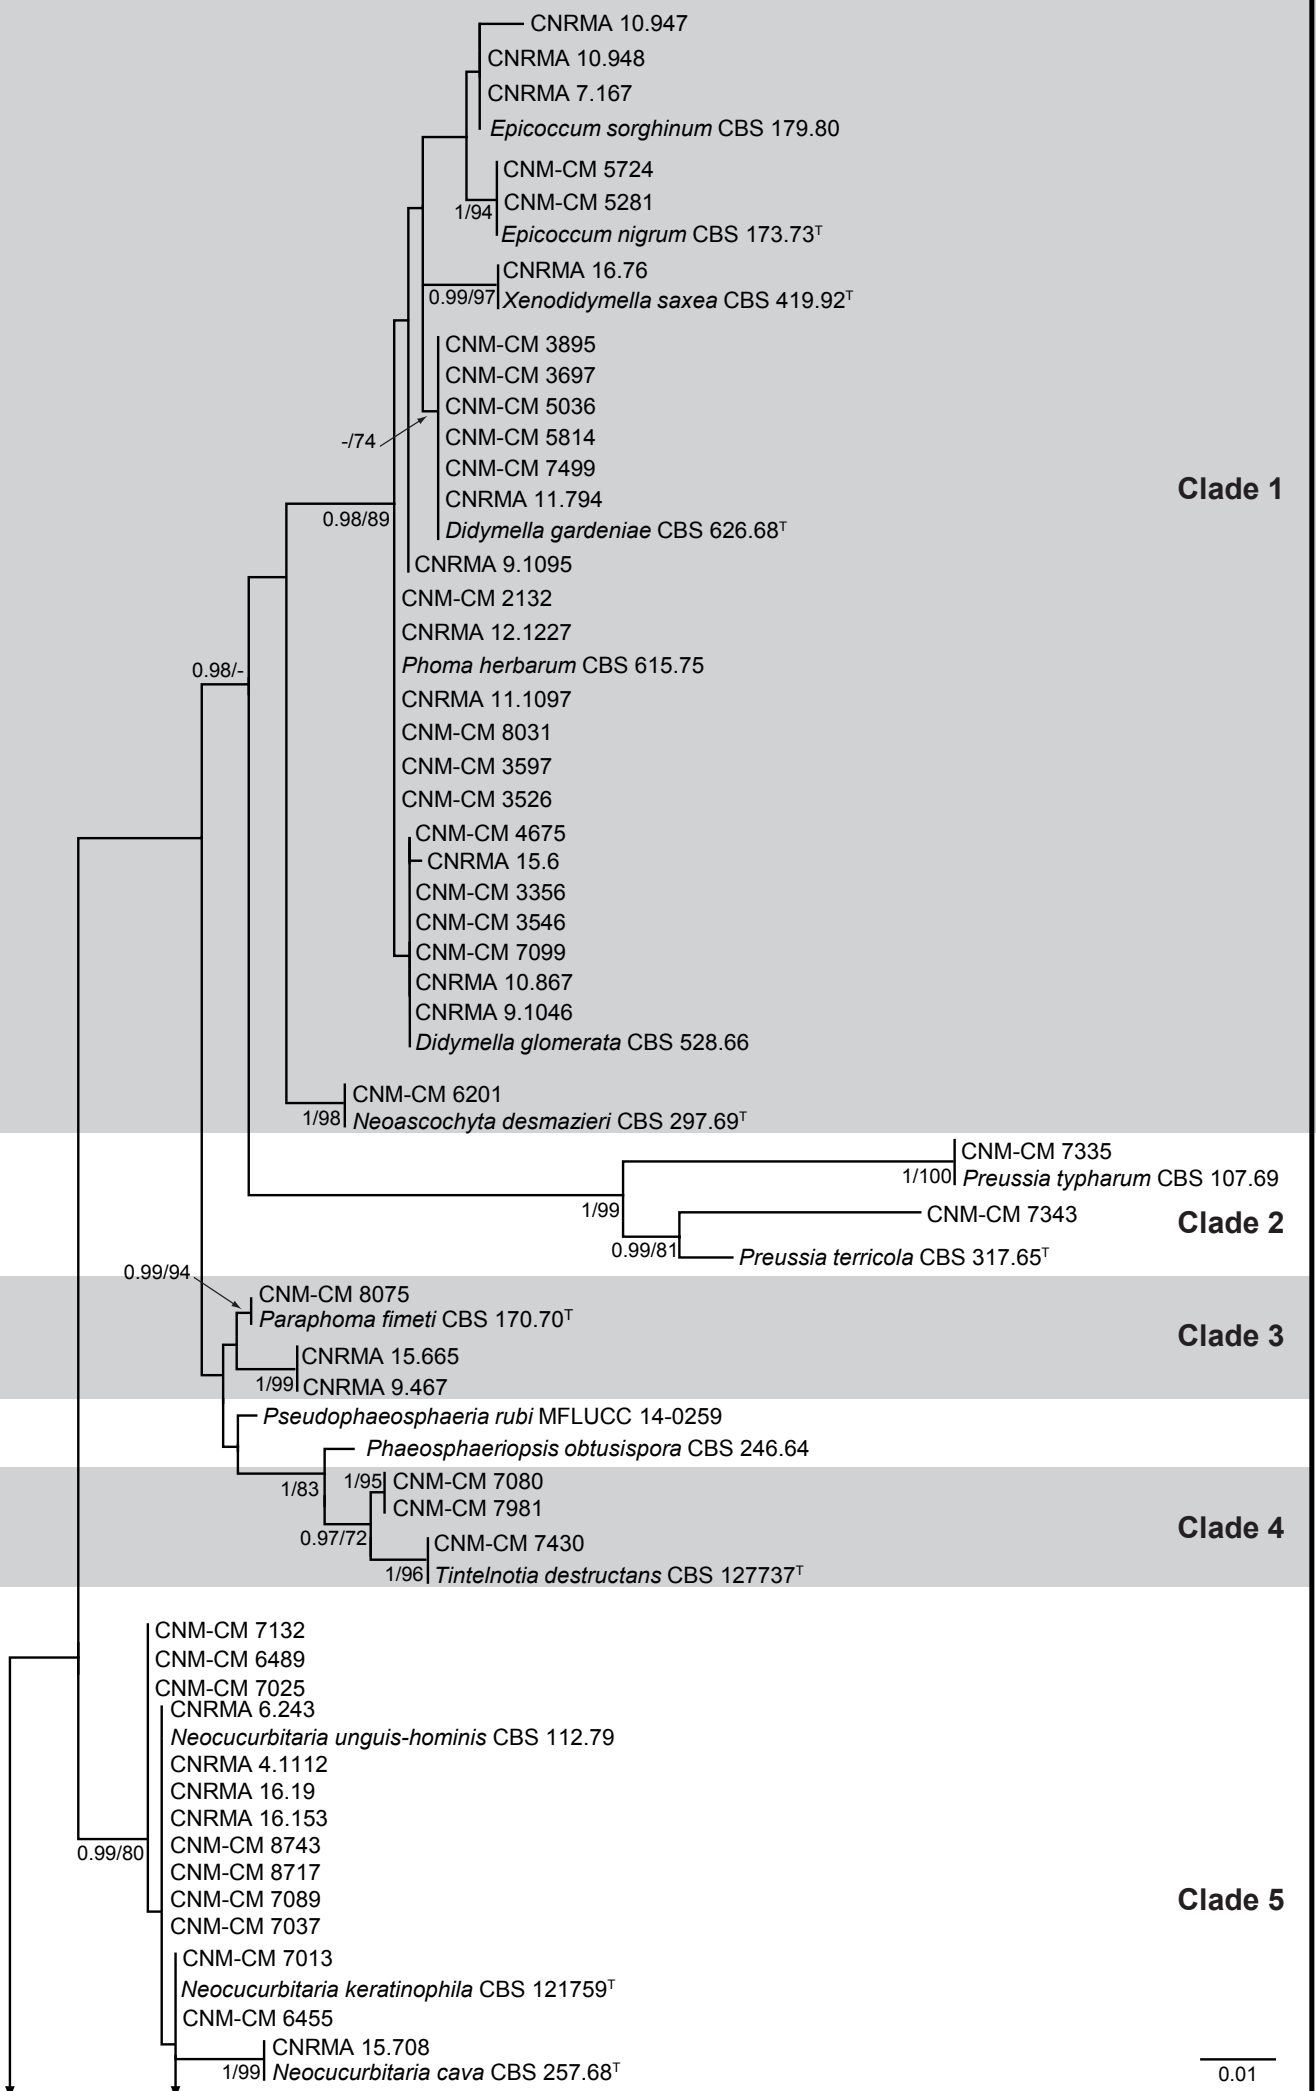

Pleosporales

0.01

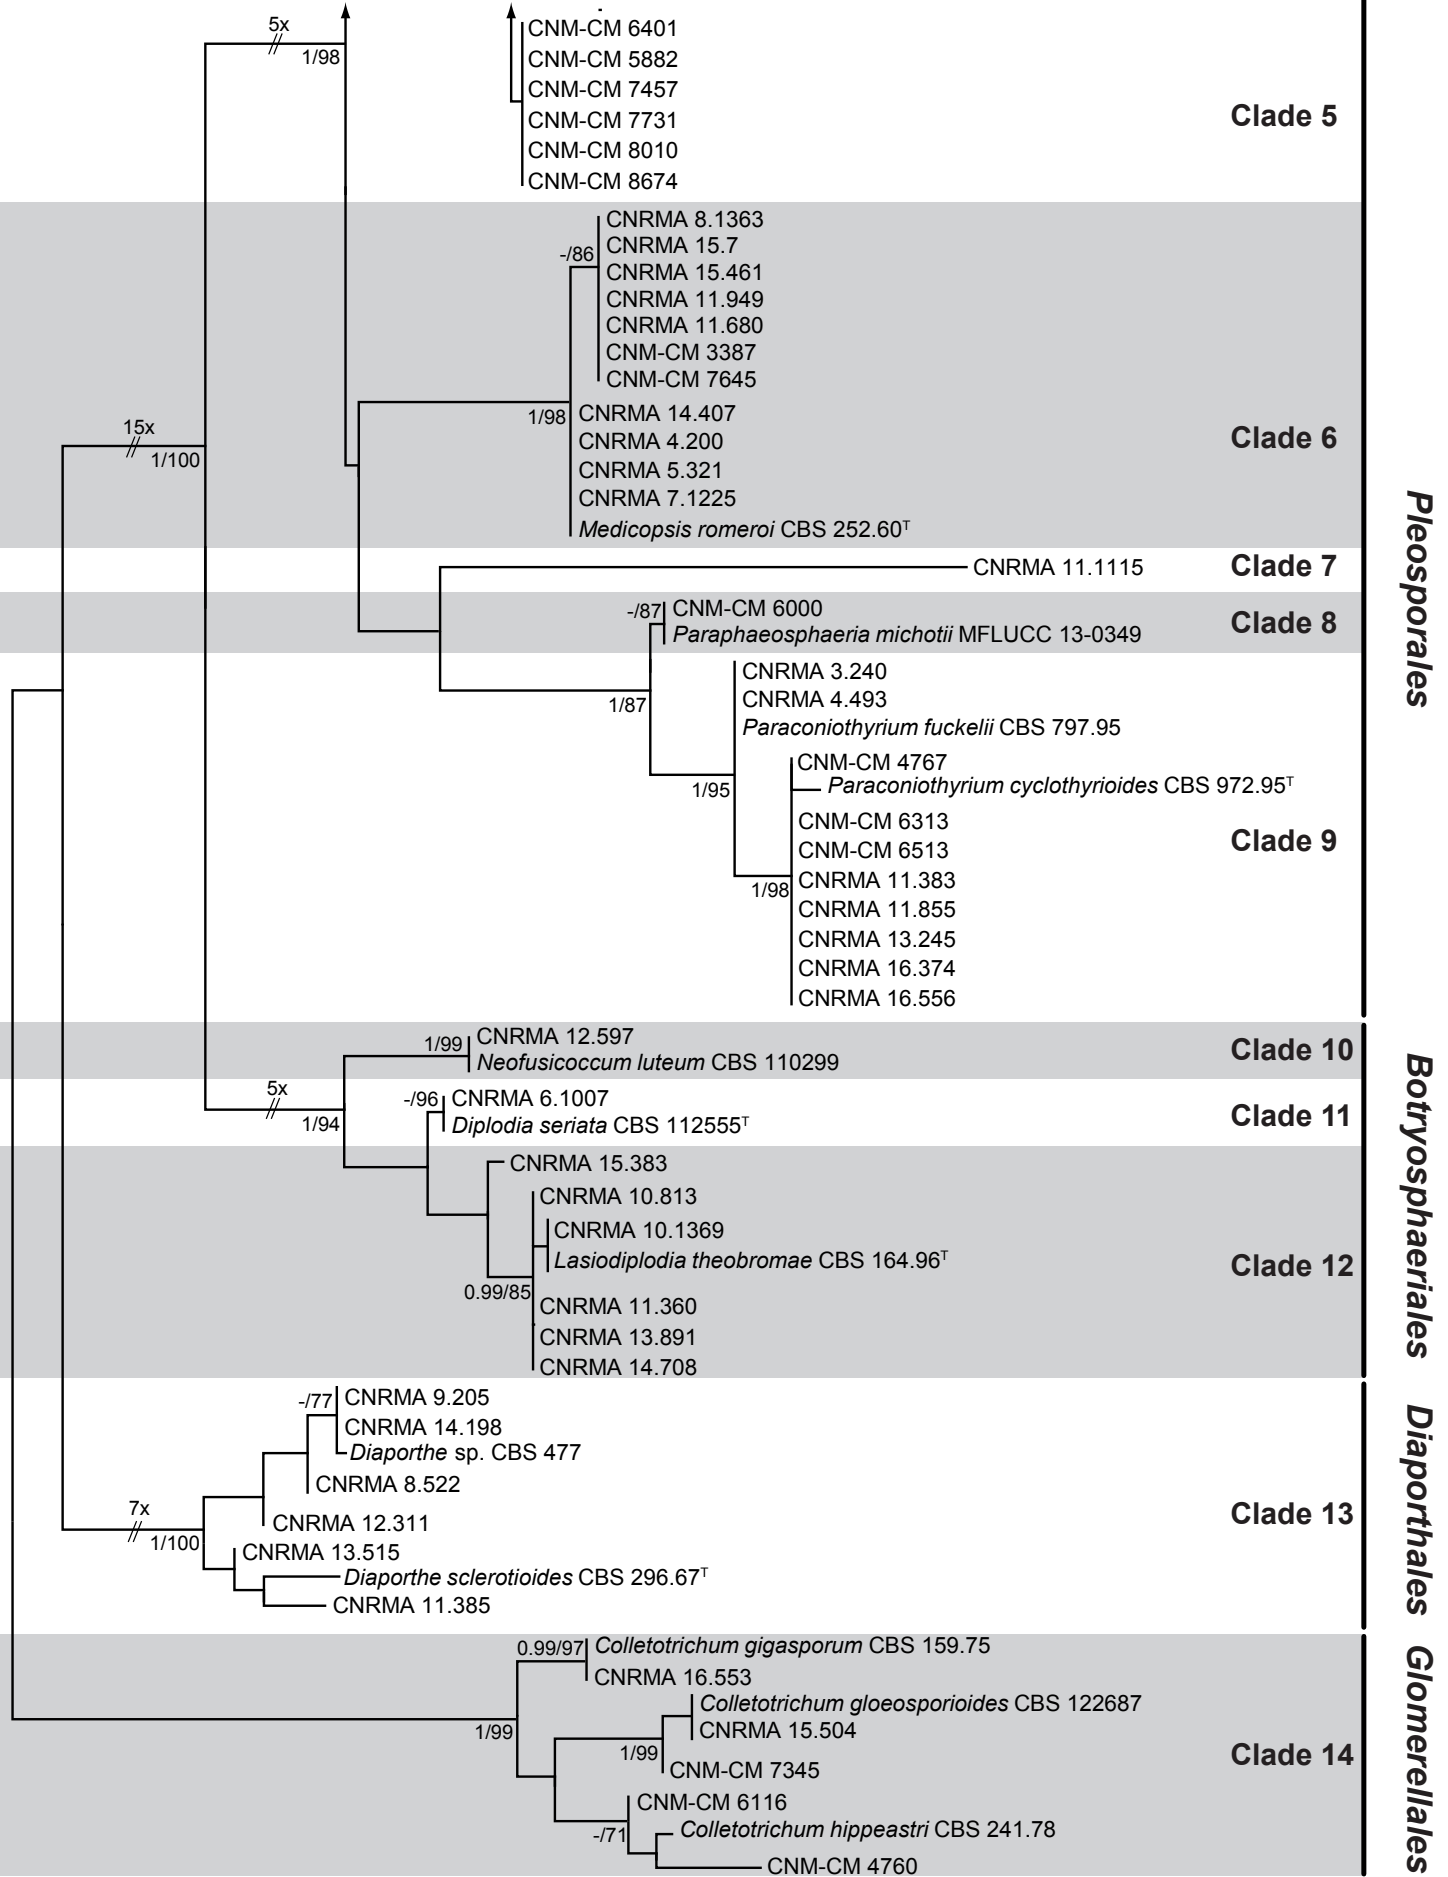

Source: https://www.biorxiv.org/content/10.1101/323618v1.full.pdf
